# Supplementary material
Source: Research Square preprint supplement (doi:10.21203/rs.3.rs-9574334/v1)
Supplement: Supplementary file 1 [file 60643d377bfd0ab0059dac14.docx]

Table B 1: Appraisal checklist for non-randomized study designs

|  | **Bassett et al. 2024** | **Thapa et al. 2025** |
| --- | --- | --- |
| Were the two groups similar and recruited from the same population? | Yes | Yes |
| Were the exposures measured similarly to assign people to both exposed and unexposed groups? | Yes | Yes |
| Was the exposure measured in a valid and reliable way? | Yes | Yes |
| Were confounding factors identified? | No | Yes |
| Were strategies to deal with confounding factors stated? | Yes | Yes |
| Were the groups/participants free of the outcome at the start of the study (or at the moment of exposure)? | No | ? |
| Were the outcomes measured in a valid and reliable way? | Yes | Yes |
| Was the follow up time reported and sufficient to be long enough for outcomes to occur? | Yes | ? |
| Was follow up complete, and if not, were the reasons to loss to follow up described and explored? | Yes | Yes |
| Were strategies to address incomplete follow up utilized? | Yes | Yes |
| Was appropriate statistical analysis used? | Yes | Yes |

(?) = unclear

Table B 2: Quality appraisal for randomized controlled trials (RCTs)

| Bias domain | Source of bias | Amstutz  et al. 2021 | Kurth  et al. 2019 | Njau  et al. 2024 | Fahey  et al. 2020 | Lester  et al. 2010 | Weiser  et al. 2015 | Cohen  et al. 2025 | Thirumurthy  et al. 2019 | Haas  et al. 2023 | Onoya et al. 2024 | Wachira et al. 2022 | Jones  et al. 2019 | Bogat et al. 2024 |
| --- | --- | --- | --- | --- | --- | --- | --- | --- | --- | --- | --- | --- | --- | --- |
| Selection bias | Random Sequence Generation | + | + | + | + | + | + | + | + | + | + | + | + | - |
| Allocation Concealment | + | + | ? | + | + | ? | ? | + | + | + | ? | + | ? |
| Perfomance bias | Blinding of participants and personnel | - | ? | - | - | - | - | - | - | - | ? | - | ? | ? |
| Detection bias | Blinding of outcome assessment | + | + | + | + | + | + | + | + | + | + | + | + | + |
| Attrition bias | Incomplete outcome data | + | + | + | + | + | - | + | + | + | + | + | + | + |
| Reporting bias | Selective reporting | + | - | + | + | + | + | + | + | + | + | + | + | + |

(+) = Low risk , (-) = high risk , (?)=unclear
