# Supplementary material
Source: Research Square preprint supplement (doi:10.21203/rs.3.rs-9574334/v1)
Supplement: Supplementary file 2 [file aea2545adaaeb2fc6d005b8a.docx]

**A systematic review of** **behavioral and psychosocial interventions to improve sustained viral suppression among patients on antiretroviral therapy in South Africa**.

Research question

What **interventions** are currently patient in place to help adult patients who are on **antiretroviral therapy** **sustain viral suppression** once it has been achieved?

Key concepts: interventions AND antiretroviral therapy AND viral suppression

Concept 1: interventions

Keywords: "Adherence Interventions"[Mesh] AND "Psychosocial Intervention"[Mesh] OR “strateg*”[tw] OR “program*”

Concept 2: Antiretroviral therapy

Keywords: "Antiretroviral Therapy, Highly Active"[Mesh] OR ART*[tw] OR HAART[tw] OR “ therap*”[tw] OR cART[tw] OR “HIV therapy” OR “HIV treatment” OR “antiretroviral treatment”

Concept 3: viral suppression

Keywords: "Sustained Virologic Response"[Mesh] OR “virological* suppress*”[tw] OR “suppressed viral load*”[tw] OR “undetectable viral load*” [tw] OR “viral containment” OR “viral control” OR “viral load reduction” OR “viral inhibition”

Table 1: search strategies

|  | Pubmed | Limits (Filter, limits, refine | Number of records | Date |
| --- | --- | --- | --- | --- |
| #1 | "Adherence Interventions"[Mesh] AND "Psychosocial Intervention"[Mesh] OR "strateg*"[tw] OR "program*" |  | 225,130 | 26-07-2025 |
| #2 | "Antiretroviral Therapy, Highly Active"[Mesh] OR ART*[tw] OR HAART[tw] OR " therap*"[tw] OR cART[tw] OR "HIV therapy" OR "HIV treatment" OR "antiretroviral treatment" |  | 2,195,610 | 26-07-2025 |
| #3 | "Sustained Virologic Response"[Mesh] OR "virological* suppress*"[tw] OR "suppressed viral load*"[tw] OR "undetectable viral load*" [tw] OR "viral containment" OR "viral control" OR "viral load reduction" OR "viral inhibition" |  | 64,897 | 26-07-2025 |
| #4 | #1 AND #2 AND #3 | Full text, peer reviewed, publication dates 2003-2025 English language | 1,222 | 26-07-2025 |

|  | Medline | Limits (Filter, limits, refine | Number of records | Date |
| --- | --- | --- | --- | --- |
| #1 | intervention* OR strateg* OR program* AND psychosocial OR adherence |  | 3,608,366 | 26-07-2025 |
| #2 | antiretroviral AND therapy, AND highly AND active OR art OR haart OR therap* OR cart OR hiv AND therapy OR hiv AND treatment OR antiretroviral AND treatment |  | 8,418,543 | 26-07-2025 |
| #3 | sustained AND virologic AND response OR virological* AND suppress* OR suppressed AND viral AND load* OR undetectable AND viral AND load* OR viral AND containment OR viral AND control OR viral AND load AND reduction OR viral AND inhibition |  | 259,498 | 26-07-2025 |
| #4 | ((MH "Adherence Interventions+" OR MH "Psychosocial Intervention") OR (strategies OR interventions)) AND ((MH "Antiretroviral Therapy, Highly Active" OR MH "Anti-Retroviral Agents") OR haart therapy OR art therapy) AND (MH "Sustained Virologic Response" OR virological suppression OR viral suppression OR virally suppressed AND undetectable viral load) | Full text, peer reviewed, publication dates 2003-2025 English language | 19,801 | 26-07-2025 |

|  | CINHAL | Limits (Filter, limits, refine | Number of records | Date |
| --- | --- | --- | --- | --- |
|  | intervention* OR strateg* OR program* AND psychosocial OR adherence |  | 1,019,545 | 26-07-2025 |
|  | antiretroviral AND therapy, AND highly AND active OR art OR haart OR therap* OR cart OR hiv AND therapy OR hiv AND treatment OR antiretroviral AND treatment |  | 1,790,586 | 26-07-2025 |
|  | sustained AND virologic AND response OR virological* AND suppress* OR suppressed AND viral AND load* OR undetectable AND viral AND load* OR viral AND containment OR viral AND control OR viral AND load AND reduction OR viral AND inhibition |  | 21,172 | 26-07-2025 |
|  | (intervention* OR strateg* OR program* AND psychosocial OR adherence) AND (antiretroviral AND therapy, AND highly AND active OR art OR haart OR therap* OR cart OR hiv AND therapy OR hiv AND treatment OR antiretroviral AND treatment) AND (sustained AND virologic AND response OR virological* AND suppress* OR suppressed AND viral AND load* OR undetectable AND viral AND load* OR viral AND containment OR viral AND control OR viral AND load AND reduction OR viral AND inhibition) | Full text, peer reviewed, publication dates 2003-2025 English language | 3,097 | 26-07-2025 |
